# Supplementary material for: Case conferences for infective endocarditis: A quality improvement initiative
Source: PLOS journal article supplement (doi:10.1371/journal.pone.0205528), 2018-10-11
Supplement: S3 (10.1371/journal.pone.0205528.s003) [file redirect.do]

**S2 Table. Protocol Compliance Process Measures in Post-Intervention Group, in Subset of Patients with Definitive Infective Endocarditis.**

| <b>Outcome (%)</b>                                                              | <b>Post-intervention<br/>(n=56)</b> |
|---------------------------------------------------------------------------------|-------------------------------------|
| Working group discussion                                                        | 56 (100)                            |
| Electronic                                                                      | 26 (46.4)                           |
| Face-to-face case conference                                                    | 30 (53.6)                           |
| Median time from admission to case conference, in days<br>(interquartile range) | 3 (2–6)                             |
| Recommendation made                                                             |                                     |
| Emergent surgery                                                                | 3 (5.4)                             |
| Urgent surgery                                                                  | 18 (32.1)                           |
| Elective surgery, prior to discharge                                            | 2 (3.6)                             |
| Elective surgery, after discharge                                               | 2 (3.6)                             |
| Surgery decision pending, re-assess in hospital                                 | 2 (3.6)                             |
| Surgery decision pending, re-assess after discharge                             | 1 (1.8)                             |
| Medical management                                                              | 25 (44.6)                           |
| Recommendation entered into electronic medical record                           | 42 (75.0)                           |
