# Supplementary material for: Case conferences for infective endocarditis: A quality improvement initiative
Source: PLOS journal article supplement (doi:10.1371/journal.pone.0205528), 2018-10-11
Supplement: S4 (10.1371/journal.pone.0205528.s004) [file journal.pone.0205528.s004]

**S3 Table. Hospital Care Process Measures of Pre-Intervention and Post-Intervention Groups, in Subset of Patients with Definite Infective Endocarditis.**

| <b>Outcome (%)</b>                                                   | <b>Pre-intervention<br/>(n=69)</b> | <b>Post-intervention<br/>(n=56)</b> | <b>p value</b> |
|----------------------------------------------------------------------|------------------------------------|-------------------------------------|----------------|
| Assessments performed                                                |                                    |                                     |                |
| Cardiac surgery                                                      | 50 (72.5)                          | 33 (58.9)                           | 0.13           |
| Cardiology                                                           | 48 (69.6)                          | 51 (91.1)                           | <i>0.004</i>   |
| Infectious diseases                                                  | 69 (100)                           | 55 (98.2)                           | 0.45           |
| Cardiac surgery performed                                            | 15 (21.7)                          | 25 (44.6)                           | <i>0.007</i>   |
| Median time from admission to surgery, in days (interquartile range) | 7 (4–13.5)                         | 7 (4–11)                            | 0.78           |
| Appropriate antimicrobial agent                                      | 69 (100)                           | 56 (100)                            | 0.78           |
| Appropriate antimicrobial duration                                   | 69 (100)                           | 56 (100)                            | 1              |
| Follow-up*                                                           |                                    |                                     |                |
| Cardiac surgery                                                      | 13 (22.8)                          | 14 (33.3)                           | 0.26           |
| Cardiology                                                           | 11 (19.3)                          | 13 (31.0)                           | 0.54           |
| Infectious diseases                                                  | 37 (64.9)                          | 24 (57.1)                           | 0.53           |

\*Excluding in-hospital deaths (pre-intervention: n=57, post-intervention: n=42)
