# Supplementary material for: Case conferences for infective endocarditis: A quality improvement initiative
Source: PLOS journal article supplement (doi:10.1371/journal.pone.0205528), 2018-10-11
Supplement: S5 (10.1371/journal.pone.0205528.s005) [file journal.pone.0205528.s005]

**S4 Table. Patient Outcomes in Pre-Intervention and Post-Intervention Groups, in Subset of Patients with Definite Infective Endocarditis.**

| <b>Outcome</b>                                                | <b>Pre-intervention<br/>(n=69)</b> | <b>Post-intervention<br/>(n=56)</b> | <b>p value</b> |
|---------------------------------------------------------------|------------------------------------|-------------------------------------|----------------|
| Complications new or worse from admission (%)                 |                                    |                                     |                |
| Any complication                                              | 40 (58.0)                          | 23 (41.1)                           | 0.07           |
| Congestive heart failure                                      | 15 (21.7)                          | 7 (12.5)                            | 0.24           |
| Ischemic stroke                                               | 6 (8.7)                            | 4 (7.1)                             | 1              |
| Hemorrhagic stroke                                            | 5 (7.2)                            | 1 (1.8)                             | 0.22           |
| Non-neurologic emboli                                         | 7 (10.1)                           | 4 (7.1)                             | 0.75           |
| Mycotic aneurysm                                              | 0 (0)                              | 2 (3.6)                             | 0.20           |
| Arrhythmia                                                    | 21 (30.4)                          | 10 (17.9)                           | 0.14           |
| Unexpected or prolonged critical care admission               | 17 (24.6)                          | 6 (10.7)                            | 0.06           |
| Intra-aortic balloon pump                                     | 0 (0)                              | 1 (1.8)                             | 0.45           |
| Renal replacement therapy                                     | 4 (5.8)                            | 8 (14.3)                            | 0.13           |
| Median length of hospital stay, in days (interquartile range) | 16 (10–33)                         | 15 (8.75–23.25)                     | 0.29           |
| Loss to follow-up                                             | 7 (10.1)                           | 2 (3.6)                             | 0.19           |
| Re-admissions (%)*                                            | 17 (33.3)                          | 9 (23.1)                            | 0.35           |
| Attributable re-admissions*                                   | 14 (27.5)                          | 5 (12.8)                            | 0.12           |
| Relapses (%)*                                                 | 2 (3.9)                            | 1 (2.6)                             | 1              |
| Hospital mortality (%)                                        | 11 (15.9)                          | 15 (26.8)                           | 0.18           |
| Mortality up to 90 days after hospital discharge (%)          | 13 (18.8)                          | 16 (28.6)                           | 0.21           |

\*Excluding losses to follow-up and patients who died during the index hospitalization (pre-intervention: n=51, post-intervention: n=39)
